# Supplementary material for: The effects of foliar application of alginate oligosaccharide at different stage on wheat yield components
Source: Research Square preprint supplement (doi:10.21203/rs.3.rs-1603067/v1), 2022-06-03
Supplement: Supplementary file 1 [file 54ba2bb603de4f4c620712b9.doc]

Table 1. Effects of AOS on the spike number of different wheat cultivars

| **stage** | **Treatments** | **CH1. spike number** **(Ten thousand/ha)** | | | | **TM6. spike number (Ten thousand/ha)** | | | | **ZM175. spike number (Ten thousand/ha)** | | | |
| --- | --- | --- | --- | --- | --- | --- | --- | --- | --- | --- | --- | --- | --- |
| **2017** | **IRCC ±%** | **2018** | **IRCC ±%** | **2017** | **IRCC ±%** | **2018** | **IRCC ±%** | **2017** | **IRCC ±%** | **2018** | **IRCC ±%** |
| **Tf1** | **1** | **505.95 bA** | **5.51** | **467.70 aA** | **1.54** | **612.45 bA** | **6.69** | **526.95 aA** | **2.83** | **568.05 aA** | **5.11** | **523.50 aA** | **0.58** |
| **2** | **502.05 bB** | **4.69** | **449.70 aA** | **-2.63** | **641.55 aA** | **11.76** | **526.50 aA** | **2.73** | **571.05 aA** | **5.66** | **512.55 aA** | **-1.54** |
| **3** | **513.45 aA** | **7.07** | **445.5 aA** | **-3.29** | **612.00 bA** | **6.61** | **503.55 aA** | **-1.76** | **566.55aA** | **4.80** | **513.00 aA** | **-1.44** |
| **4** | **479.55 cB** |  | **460.65 aA** |  | **574.05 cB** |  | **512.55 aA** |  | **540.45 bA** |  | **520.50 aA** |  |
| **Tf2** | **1** | **500.55 aA** | **1.64** | **465.75 aA** | **1.12** | **536.55aA** | **7.51** | **548.55**  **aA** | **8.08** | **531.45bA** | **-1.58** | **523.50aA** | **0.67** |
| **2** | **490.50 aA** | **-0.40** | **461.70 aA** | **0.24** | **499.05 bA** | **0.00** | **522.45bB** | **2.96** | **556.05aA** | **2.97** | **520.05 aA** | **0.0** |
| **3** | **458.55 bA** | **-6.88** | **449.55 aA** | **-2.41** | **507.00 aA** | **1.59** | **496.05 bB** | **-2.27** | **556.05 aA** | **2.97** | **519.00 aA** | **-0.19** |
| **4** | **492.45 aA** |  | **460.65 aA** |  | **499.05bA** |  | **507.45bB** |  | **540.00 bA** |  | **520.05aA** |  |
| **Tf3** | **1** | **503.55 aA** | **7.36** | **456.60 aA** | **0.22** | **523.95 aA** | **4.80** | **544.05 aA** | **6.15** | **573.45aA** | **5.99** | **524.55aA** | **3.96** |
| **2** | **508.95 aA** | **8.51** | **443.10 aA** | **-2.73** | **516.00 aA** | **3.21** | **506.55 bB** | **-1.17** | **546.00 aA** | **0.92** | **516.45 aA** | **2.38** |
| **3** | **492.45 aA** | **4.99** | **437.85 aA** | **-3.90** | **514.95 aA** | **3.00** | **502.95**  **bB** | **-1.85** | **564.45 aA** | **4.32** | **516.00aA** | **2.28** |
| **4** | **469.05 bA** |  | **455.55 aA** |  | **499.95aA** |  | **512.55 bB** |  | **541.05 aA** |  | **504.45 aA** |  |

- abbreviations：IRCC- The [increasing](javascript:;) [rate](javascript:;) compared with the control
- Note: Lower case letters in the table indicate significant at p<0.05, upper case letters indicate significant at p<0.01.
